# Supplementary material for: Estimating Vaccine Confidence Levels among Healthcare Staff and Students of a Tertiary Institution in South Africa
Source: MDPI journal article supplement (doi:10.3390/vaccines9111246), 2021-10-27
Supplement: s1 [file s1]

**Table S4:** Associations between quantitative variables and importance of vaccines for self statement

| Quantitative variables |               | Vaccines are important for me to have statement |       |       | p-value |
|------------------------|---------------|-------------------------------------------------|-------|-------|---------|
|                        |               | Disagree                                        | Agree | Total |         |
| age                    | Median        | 32,00                                           | 29,00 | 29,00 | 0.429   |
|                        | Percentile 25 | 22,00                                           | 21,00 | 22,00 |         |
|                        | Percentile 75 | 39,00                                           | 38,00 | 38,00 |         |
| Post matric            | Median        | 5,00                                            | 6,00  | 6,00  | 0.611   |
|                        | Percentile 25 | 3,00                                            | 4,00  | 4,00  |         |
|                        | Percentile 75 | 14,00                                           | 11,00 | 11,00 |         |
