# Supplementary material for: Estimating Vaccine Confidence Levels among Healthcare Staff and Students of a Tertiary Institution in South Africa
Source: MDPI journal article supplement (doi:10.3390/vaccines9111246), 2021-10-27
Supplement: s1 [file s1]

**Table S1.** Associations between categorical demographic variables and the importance of vaccines for children statement.

| Categorical demographic variables |                   | Vaccines are important for children to have statement |         |       |         |       |         | p-value |
|-----------------------------------|-------------------|-------------------------------------------------------|---------|-------|---------|-------|---------|---------|
|                                   |                   | Disagree                                              |         | Agree |         | Total |         |         |
|                                   |                   | Count                                                 | Row N % | Count | Row N % | Count | Row N % |         |
| Staff/Student                     | Staff             | 4                                                     | 1.6%    | 245   | 98.4%   | 249   | 100.0%  | 0.472   |
|                                   | Student           | 19                                                    | 2.9%    | 644   | 97.1%   | 663   | 100.0%  |         |
|                                   | Both              | 3                                                     | 3.6%    | 80    | 96.4%   | 83    | 100.0%  |         |
|                                   | Total             | 26                                                    | 2.6%    | 969   | 97.4%   | 995   | 100.0%  |         |
| Sex                               | Male              | 9                                                     | 3.6%    | 241   | 96.4%   | 250   | 100.0%  | 0.376   |
|                                   | Female            | 17                                                    | 2.3%    | 727   | 97.7%   | 744   | 100.0%  |         |
|                                   | Other             | 0                                                     | 0.0%    | 1     | 100.0%  | 1     | 100.0%  |         |
|                                   | Total             | 26                                                    | 2.6%    | 969   | 97.4%   | 995   | 100.0%  |         |
| degree                            | BSc               | 10                                                    | 2.8%    | 345   | 97.2%   | 355   | 100.0%  | 0.786   |
|                                   | Hons              | 5                                                     | 3.8%    | 128   | 96.2%   | 133   | 100.0%  |         |
|                                   | MBBS              | 6                                                     | 2.8%    | 212   | 97.2%   | 218   | 100.0%  |         |
|                                   | MSc               | 3                                                     | 1.5%    | 196   | 98.5%   | 199   | 100.0%  |         |
|                                   | PhD               | 2                                                     | 2.2%    | 88    | 97.8%   | 90    | 100.0%  |         |
|                                   | Total             | 26                                                    | 2.6%    | 969   | 97.4%   | 995   | 100.0%  |         |
| religion                          | Islam             | 7                                                     | 6.4%    | 103   | 93.6%   | 110   | 100.0%  | 0.351   |
|                                   | Roman Catholic    | 3                                                     | 3.3%    | 88    | 96.7%   | 91    | 100.0%  |         |
|                                   | Orthodox          | 10                                                    | 3.2%    | 303   | 96.8%   | 313   | 100.0%  |         |
|                                   | Pentecostal       | 3                                                     | 1.6%    | 186   | 98.4%   | 189   | 100.0%  |         |
|                                   | Traditional       | 2                                                     | 2.7%    | 73    | 97.3%   | 75    | 100.0%  |         |
|                                   | Jewish            | 0                                                     | 0.0%    | 7     | 100.0%  | 7     | 100.0%  |         |
|                                   | Buddhist          | 0                                                     | 0.0%    | 4     | 100.0%  | 4     | 100.0%  |         |
|                                   | Hindu             | 0                                                     | 0.0%    | 25    | 100.0%  | 25    | 100.0%  |         |
|                                   | Atheist           | 0                                                     | 0.0%    | 74    | 100.0%  | 74    | 100.0%  |         |
|                                   | Agnostic          | 1                                                     | 1.4%    | 72    | 98.6%   | 73    | 100.0%  |         |
|                                   | Other             | 0                                                     | 0.0%    | 25    | 100.0%  | 25    | 100.0%  |         |
|                                   | 7th Day Adventist | 0                                                     | 0.0%    | 9     | 100.0%  | 9     | 100.0%  |         |
|                                   | Total             | 26                                                    | 2.6%    | 969   | 97.4%   | 995   | 100.0%  |         |
| Age group                         | ≤24               | 13                                                    | 3.2%    | 394   | 96.8%   | 407   | 100.0%  | 0.457   |
|                                   | 25-34             | 3                                                     | 1.2%    | 238   | 98.8%   | 241   | 100.0%  |         |
|                                   | 35-44             | 5                                                     | 2.7%    | 183   | 97.3%   | 188   | 100.0%  |         |
|                                   | 45-54             | 2                                                     | 2.5%    | 78    | 97.5%   | 80    | 100.0%  |         |

|  |       |    |       |     |       |     |        |  |
|--|-------|----|-------|-----|-------|-----|--------|--|
|  | 55-64 | 2  | 2.9%  | 67  | 97.1% | 69  | 100.0% |  |
|  | ≥65   | 1  | 10.0% | 9   | 90.0% | 10  | 100.0% |  |
|  | Total | 26 | 2.6%  | 969 | 97.4% | 995 | 100.0% |  |
