# Supplementary material for: Estimating Vaccine Confidence Levels among Healthcare Staff and Students of a Tertiary Institution in South Africa
Source: MDPI journal article supplement (doi:10.3390/vaccines9111246), 2021-10-27
Supplement: s1 [file s1]

**Table S5:** Associations between categorical demographic variables and vaccine safety statement

| Categorical demographic variables |                   | Overall, I think vaccines are safe |         |       |         |       |         | p-value |
|-----------------------------------|-------------------|------------------------------------|---------|-------|---------|-------|---------|---------|
|                                   |                   | Disagree                           |         | Agree |         | Total |         |         |
|                                   |                   | Count                              | Row N % | Count | Row N % | Count | Row N % |         |
| Staff/Student                     | Staff             | 7                                  | 3.0%    | 227   | 97.0%   | 234   | 100.0%  | 0.379   |
|                                   | Student           | 31                                 | 5.0%    | 592   | 95.0%   | 623   | 100.0%  |         |
|                                   | Both              | 5                                  | 6.2%    | 76    | 93.8%   | 81    | 100.0%  |         |
|                                   | Total             | 43                                 | 4.6%    | 895   | 95.4%   | 938   | 100.0%  |         |
| Sex                               | Male              | 6                                  | 2.5%    | 234   | 97.5%   | 240   | 100.0%  | 0.118   |
|                                   | Female            | 37                                 | 5.3%    | 660   | 94.7%   | 697   | 100.0%  |         |
|                                   | Other             | 0                                  | 0.0%    | 1     | 100.0%  | 1     | 100.0%  |         |
|                                   | Total             | 43                                 | 4.6%    | 895   | 95.4%   | 938   | 100.0%  |         |
| degree                            | BSc               | 15                                 | 4.6%    | 311   | 95.4%   | 326   | 100.0%  | 0.285   |
|                                   | Hons              | 10                                 | 8.3%    | 110   | 91.7%   | 120   | 100.0%  |         |
|                                   | MBBS              | 7                                  | 3.3%    | 207   | 96.7%   | 214   | 100.0%  |         |
|                                   | MSc               | 7                                  | 3.7%    | 181   | 96.3%   | 188   | 100.0%  |         |
|                                   | PhD               | 4                                  | 4.4%    | 86    | 95.6%   | 90    | 100.0%  |         |
|                                   | Total             | 43                                 | 4.6%    | 895   | 95.4%   | 938   | 100.0%  |         |
| religion                          | Islam             | 7                                  | 6.8%    | 96    | 93.2%   | 103   | 100.0%  |         |
|                                   | Roman Catholic    | 5                                  | 5.7%    | 82    | 94.3%   | 87    | 100.0%  |         |
|                                   | Orthodox          | 12                                 | 4.2%    | 277   | 95.8%   | 289   | 100.0%  |         |
|                                   | Pentecostal       | 9                                  | 5.1%    | 169   | 94.9%   | 178   | 100.0%  |         |
|                                   | Traditional       | 3                                  | 4.3%    | 66    | 95.7%   | 69    | 100.0%  |         |
|                                   | Jewish            | 0                                  | 0.0%    | 8     | 100.0%  | 8     | 100.0%  |         |
|                                   | Buddhist          | 0                                  | 0.0%    | 4     | 100.0%  | 4     | 100.0%  |         |
|                                   | Hindu             | 0                                  | 0.0%    | 25    | 100.0%  | 25    | 100.0%  |         |
|                                   | Atheist           | 2                                  | 2.7%    | 72    | 97.3%   | 74    | 100.0%  |         |
|                                   | Agnostic          | 1                                  | 1.4%    | 69    | 98.6%   | 70    | 100.0%  |         |
|                                   | Other             | 1                                  | 4.5%    | 21    | 95.5%   | 22    | 100.0%  |         |
|                                   | 7th Day Adventist | 3                                  | 33.3%   | 6     | 66.7%   | 9     | 100.0%  |         |
|                                   | Total             | 43                                 | 4.6%    | 895   | 95.4%   | 938   | 100.0%  |         |
| Age group                         | ≤24               | 19                                 | 5.0%    | 364   | 95.0%   | 383   | 100.0%  | 0.746   |
|                                   | 25-34             | 8                                  | 3.6%    | 217   | 96.4%   | 225   | 100.0%  |         |
|                                   | 35-44             | 8                                  | 4.4%    | 172   | 95.6%   | 180   | 100.0%  |         |
|                                   | 45-54             | 3                                  | 4.0%    | 72    | 96.0%   | 75    | 100.0%  |         |
|                                   | 55-64             | 5                                  | 7.7%    | 60    | 92.3%   | 65    | 100.0%  |         |

|  |       |    |      |     |        |     |        |  |
|--|-------|----|------|-----|--------|-----|--------|--|
|  | ≥65   | 0  | 0.0% | 10  | 100.0% | 10  | 100.0% |  |
|  | Total | 43 | 4.6% | 895 | 95.4%  | 938 | 100.0% |  |
