# Supplementary material for: Estimating Vaccine Confidence Levels among Healthcare Staff and Students of a Tertiary Institution in South Africa
Source: MDPI journal article supplement (doi:10.3390/vaccines9111246), 2021-10-27
Supplement: s1 [file s1]

**Table S6:** Associations between quantitative variables and vaccine safety statement

| Quantitative variables |               | Overall, I think vaccines are safe |       |       | p-value |
|------------------------|---------------|------------------------------------|-------|-------|---------|
|                        |               | Disagree                           | Agree | Total |         |
| Age                    | Median        | 27,00                              | 29,00 | 29,00 | 0.994   |
|                        | Percentile 25 | 21,00                              | 22,00 | 22,00 |         |
|                        | Percentile 75 | 42,00                              | 38,00 | 38,00 |         |
| Post matric            | Median        | 5,00                               | 6,00  | 6,00  | 0.323   |
|                        | Percentile 25 | 3,00                               | 4,00  | 4,00  |         |
|                        | Percentile 75 | 13,00                              | 11,00 | 11,00 |         |
