# Supplementary material for: Estimating Vaccine Confidence Levels among Healthcare Staff and Students of a Tertiary Institution in South Africa
Source: MDPI journal article supplement (doi:10.3390/vaccines9111246), 2021-10-27
Supplement: s1 [file s1]

**Table S7:** Associations between categorical demographic variables and vaccine effectiveness statement

| Categorical demographic variables |                   | Overall, I think vaccines are effective |         |       |         |       |         | p-value |
|-----------------------------------|-------------------|-----------------------------------------|---------|-------|---------|-------|---------|---------|
|                                   |                   | Disagree                                |         | Agree |         | Total |         |         |
|                                   |                   | Count                                   | Row N % | Count | Row N % | Count | Row N % |         |
| Staff/Student                     | Staff             | 5                                       | 2.1%    | 235   | 97.9%   | 240   | 100.0%  | 0.109   |
|                                   | Student           | 15                                      | 2.3%    | 629   | 97.7%   | 644   | 100.0%  |         |
|                                   | Both              | 5                                       | 6.1%    | 77    | 93.9%   | 82    | 100.0%  |         |
|                                   | Total             | 25                                      | 2.6%    | 941   | 97.4%   | 966   | 100.0%  |         |
| Sex                               | Male              | 3                                       | 1.2%    | 243   | 98.8%   | 246   | 100.0%  | 0.183   |
|                                   | Female            | 22                                      | 3.1%    | 697   | 96.9%   | 719   | 100.0%  |         |
|                                   | Other             | 0                                       | 0.0%    | 1     | 100.0%  | 1     | 100.0%  |         |
|                                   | Total             | 25                                      | 2.6%    | 941   | 97.4%   | 966   | 100.0%  |         |
| degree                            | BSc               | 6                                       | 1.8%    | 333   | 98.2%   | 339   | 100.0%  | 0.217   |
|                                   | Hons              | 8                                       | 6.3%    | 119   | 93.7%   | 127   | 100.0%  |         |
|                                   | MBBS              | 5                                       | 2.3%    | 212   | 97.7%   | 217   | 100.0%  |         |
|                                   | MSc               | 4                                       | 2.1%    | 189   | 97.9%   | 193   | 100.0%  |         |
|                                   | PhD               | 2                                       | 2.2%    | 88    | 97.8%   | 90    | 100.0%  |         |
|                                   | Total             | 25                                      | 2.6%    | 941   | 97.4%   | 966   | 100.0%  |         |
| religion                          | Islam             | 5                                       | 4.6%    | 104   | 95.4%   | 109   | 100.0%  | 0.109   |
|                                   | Roman Catholic    | 2                                       | 2.2%    | 89    | 97.8%   | 91    | 100.0%  |         |
|                                   | Orthodox          | 7                                       | 2.3%    | 293   | 97.7%   | 300   | 100.0%  |         |
|                                   | Pentecostal       | 5                                       | 2.7%    | 180   | 97.3%   | 185   | 100.0%  |         |
|                                   | Traditional       | 2                                       | 2.9%    | 66    | 97.1%   | 68    | 100.0%  |         |
|                                   | Jewish            | 0                                       | 0.0%    | 8     | 100.0%  | 8     | 100.0%  |         |
|                                   | Buddhist          | 0                                       | 0.0%    | 4     | 100.0%  | 4     | 100.0%  |         |
|                                   | Hindu             | 0                                       | 0.0%    | 25    | 100.0%  | 25    | 100.0%  |         |
|                                   | Atheist           | 1                                       | 1.4%    | 73    | 98.6%   | 74    | 100.0%  |         |
|                                   | Agnostic          | 1                                       | 1.4%    | 70    | 98.6%   | 71    | 100.0%  |         |
|                                   | Other             | 0                                       | 0.0%    | 22    | 100.0%  | 22    | 100.0%  |         |
|                                   | 7th Day Adventist | 2                                       | 22.2%   | 7     | 77.8%   | 9     | 100.0%  |         |
|                                   | Total             | 25                                      | 2.6%    | 941   | 97.4%   | 966   | 100.0%  |         |
| Age group                         | ≤24               | 8                                       | 2.0%    | 390   | 98.0%   | 398   | 100.0%  | 0.486   |
|                                   | 25-34             | 7                                       | 3.1%    | 221   | 96.9%   | 228   | 100.0%  |         |
|                                   | 35-44             | 4                                       | 2.2%    | 180   | 97.8%   | 184   | 100.0%  |         |
|                                   | 45-54             | 2                                       | 2.5%    | 78    | 97.5%   | 80    | 100.0%  |         |
|                                   | 55-64             | 4                                       | 6.1%    | 62    | 93.9%   | 66    | 100.0%  |         |

|  |       |    |      |     |        |     |        |  |
|--|-------|----|------|-----|--------|-----|--------|--|
|  | ≥65   | 0  | 0.0% | 10  | 100.0% | 10  | 100.0% |  |
|  | Total | 25 | 2.6% | 941 | 97.4%  | 966 | 100.0% |  |
