# Supplementary material for: Estimating Vaccine Confidence Levels among Healthcare Staff and Students of a Tertiary Institution in South Africa
Source: MDPI journal article supplement (doi:10.3390/vaccines9111246), 2021-10-27
Supplement: s1 [file s1]

**Table S9:** Associations between categorical demographic variables and vaccine confidence and belief in religious compatibility of vaccines

| Categorical demographic variables |                | Vaccines are compatible with my religious beliefs |         |       |         |       |         | p-value |
|-----------------------------------|----------------|---------------------------------------------------|---------|-------|---------|-------|---------|---------|
|                                   |                | Disagree                                          |         | Agree |         | Total |         |         |
|                                   |                | Count                                             | Row N % | Count | Row N % | Count | Row N % |         |
| Staff/Student                     | Staff          | 12                                                | 5.2%    | 217   | 94.8%   | 229   | 100.0%  | 0.352   |
|                                   | Student        | 20                                                | 3.3%    | 592   | 96.7%   | 612   | 100.0%  |         |
|                                   | Both           | 4                                                 | 5.1%    | 75    | 94.9%   | 79    | 100.0%  |         |
|                                   | Total          | 36                                                | 3.9%    | 884   | 96.1%   | 920   | 100.0%  |         |
| Sex                               | Male           | 12                                                | 5.2%    | 220   | 94.8%   | 232   | 100.0%  | 0.234   |
|                                   | Female         | 23                                                | 3.4%    | 663   | 96.6%   | 686   | 100.0%  |         |
|                                   | Total          | 35                                                | 3.8%    | 883   | 96.2%   | 918   | 100%    |         |
| degree                            | BSc            | 16                                                | 4.8%    | 314   | 95.2%   | 330   | 100.0%  | 0.123   |
|                                   | Hons           | 8                                                 | 6.3%    | 118   | 93.7%   | 126   | 100.0%  |         |
|                                   | MBBS           | 5                                                 | 2.5%    | 197   | 97.5%   | 202   | 100.0%  |         |
|                                   | MSc            | 7                                                 | 3.9%    | 174   | 96.1%   | 181   | 100.0%  |         |
|                                   | PhD            | 0                                                 | 0.0%    | 81    | 100.0%  | 81    | 100.0%  |         |
|                                   | Total          | 36                                                | 3.9%    | 884   | 96.1%   | 920   | 100.0%  |         |
| Religion                          | Islam          | 3                                                 | 2.9%    | 100   | 97.1%   | 103   | 100.0%  | 0.851   |
|                                   | Roman Catholic | 4                                                 | 5.0%    | 76    | 95.0%   | 80    | 100.0%  |         |
|                                   | Orthodox       | 15                                                | 5.2%    | 276   | 94.8%   | 291   | 100.0%  |         |
|                                   | Pentecostal    | 7                                                 | 4.0%    | 169   | 96.0%   | 176   | 100.0%  |         |
|                                   | Traditional    | 1                                                 | 1.5%    | 66    | 98.5%   | 67    | 100.0%  |         |
|                                   | Jewish         | 0                                                 | 0.0%    | 7     | 100.0%  | 7     | 100.0%  |         |
|                                   | Buddhist       | 0                                                 | 0.0%    | 3     | 100.0%  | 3     | 100.0%  |         |
|                                   | Hindu          | 0                                                 | 0.0%    | 24    | 100.0%  | 24    | 100.0%  |         |
|                                   | Atheist        | 4                                                 | 5.3%    | 71    | 94.7%   | 75    | 100.0%  |         |
|                                   | Agnostic       | 2                                                 | 3.0%    | 64    | 97.0%   | 66    | 100.0%  |         |
|                                   | Other          | 0                                                 | 0.0%    | 21    | 100.0%  | 21    | 100.0%  |         |

|           |                      |    |      |     |        |     |        |       |
|-----------|----------------------|----|------|-----|--------|-----|--------|-------|
|           | 7th Day<br>Adventist | 0  | 0.0% | 7   | 100.0% | 7   | 100.0% |       |
|           | Total                | 36 | 3.9% | 884 | 96.1%  | 920 | 100.0% |       |
| Age group | ≤24                  | 13 | 3.5% | 363 | 96.5%  | 376 | 100.0% | 0.756 |
|           | 25-34                | 7  | 3.2% | 213 | 96.8%  | 220 | 100.0% |       |
|           | 35-44                | 7  | 4.0% | 166 | 96.0%  | 173 | 100.0% |       |
|           | 45-54                | 4  | 5.3% | 71  | 94.7%  | 75  | 100.0% |       |
|           | 55-64                | 4  | 6.2% | 61  | 93.8%  | 65  | 100.0% |       |
|           | ≥65                  | 1  | 9.1% | 10  | 90.9%  | 11  | 100.0% |       |
|           | Total                | 36 | 3.9% | 884 | 96.1%  | 920 | 100.0% |       |
