# Supplementary material for: Estimating Vaccine Confidence Levels among Healthcare Staff and Students of a Tertiary Institution in South Africa
Source: MDPI journal article supplement (doi:10.3390/vaccines9111246), 2021-10-27
Supplement: s1 [file s1]

**Table S3:** Associations between categorical demographic variables and importance of vaccines for self statement

| Categorical demographic variables |                   | Vaccines are important for me to have statement |         |       |         |       |         | p-value |
|-----------------------------------|-------------------|-------------------------------------------------|---------|-------|---------|-------|---------|---------|
|                                   |                   | Disagree                                        |         | Agree |         | Total |         |         |
|                                   |                   | Count                                           | Row N % | Count | Row N % | Count | Row N % |         |
| Staff/Student                     | Staff             | 10                                              | 4.0%    | 238   | 96.0%   | 248   | 100.0%  | 0.882   |
|                                   | Student           | 31                                              | 4.7%    | 626   | 95.3%   | 657   | 100.0%  |         |
|                                   | Both              | 4                                               | 5.0%    | 76    | 95.0%   | 80    | 100.0%  |         |
|                                   | Total             | 45                                              | 4.6%    | 940   | 95.4%   | 985   | 100.0%  |         |
| Sex                               | Male              | 9                                               | 3.6%    | 240   | 96.4%   | 249   | 100.0%  | 0.485   |
|                                   | Female            | 36                                              | 4.9%    | 700   | 95.1%   | 736   | 100.0%  |         |
|                                   | Total             | 45                                              | 4.6%    | 940   | 95.4%   | 985   | 100.0%  |         |
| degree                            | BSc               | 19                                              | 5.4%    | 334   | 94.6%   | 353   | 100.0%  | 0.140   |
|                                   | Hons              | 10                                              | 7.8%    | 119   | 92.2%   | 129   | 100.0%  |         |
|                                   | MBBS              | 9                                               | 4.2%    | 206   | 95.8%   | 215   | 100.0%  |         |
|                                   | MSc               | 4                                               | 2.0%    | 194   | 98.0%   | 198   | 100.0%  |         |
|                                   | PhD               | 3                                               | 3.3%    | 87    | 96.7%   | 90    | 100.0%  |         |
|                                   | Total             | 45                                              | 4.6%    | 940   | 95.4%   | 985   | 100.0%  |         |
| religion                          | Islam             | 7                                               | 6.5%    | 101   | 93.5%   | 108   | 100.0%  |         |
|                                   | Roman Catholic    | 4                                               | 4.3%    | 88    | 95.7%   | 92    | 100.0%  |         |
|                                   | Orthodox          | 12                                              | 3.9%    | 295   | 96.1%   | 307   | 100.0%  |         |
|                                   | Pentecostal       | 10                                              | 5.3%    | 179   | 94.7%   | 189   | 100.0%  |         |
|                                   | Traditional       | 4                                               | 5.6%    | 68    | 94.4%   | 72    | 100.0%  |         |
|                                   | Jewish            | 0                                               | 0.0%    | 7     | 100.0%  | 7     | 100.0%  |         |
|                                   | Buddhist          | 0                                               | 0.0%    | 4     | 100.0%  | 4     | 100.0%  |         |
|                                   | Hindu             | 0                                               | 0.0%    | 25    | 100.0%  | 25    | 100.0%  |         |
|                                   | Atheist           | 2                                               | 2.6%    | 74    | 97.4%   | 76    | 100.0%  |         |
|                                   | Agnostic          | 2                                               | 2.8%    | 70    | 97.2%   | 72    | 100.0%  |         |
|                                   | Other             | 1                                               | 4.2%    | 23    | 95.8%   | 24    | 100.0%  |         |
|                                   | 7th Day Adventist | 3                                               | 33.3%   | 6     | 66.7%   | 9     | 100.0%  |         |
|                                   | Total             | 45                                              | 4.6%    | 940   | 95.4%   | 985   | 100.0%  |         |
| Age group                         | ≤24               | 18                                              | 4.5%    | 386   | 95.5%   | 404   | 100.0%  | 0.463   |
|                                   | 25-34             | 8                                               | 3.4%    | 225   | 96.6%   | 233   | 100.0%  |         |
|                                   | 35-44             | 10                                              | 5.2%    | 181   | 94.8%   | 191   | 100.0%  |         |
|                                   | 45-54             | 3                                               | 3.8%    | 77    | 96.3%   | 80    | 100.0%  |         |
|                                   | 55-64             | 6                                               | 9.0%    | 61    | 91.0%   | 67    | 100.0%  |         |

|  |       |    |      |     |        |     |        |  |
|--|-------|----|------|-----|--------|-----|--------|--|
|  | ≥65   | 0  | 0.0% | 10  | 100.0% | 10  | 100.0% |  |
|  | Total | 45 | 4.6% | 940 | 95.4%  | 985 | 100.0% |  |
