# Supplementary material for: Estimating Vaccine Confidence Levels among Healthcare Staff and Students of a Tertiary Institution in South Africa
Source: MDPI journal article supplement (doi:10.3390/vaccines9111246), 2021-10-27
Supplement: s1 [file s1]

**Table S10:** The association between quantitative variables and belief in religious compatibility of vaccines

| Quantitative variables |               | Vaccines are compatible with my religious beliefs |       |       | p-value |
|------------------------|---------------|---------------------------------------------------|-------|-------|---------|
|                        |               | Disagree                                          | Agree | Total |         |
| Age                    | Median        | 33,00                                             | 29,00 | 29,00 | 0.267   |
|                        | Percentile 25 | 22,00                                             | 22,00 | 22,00 |         |
|                        | Percentile 75 | 43,50                                             | 38,00 | 38,00 |         |
| Post matric            | Median        | 5,50                                              | 6,00  | 6,00  | 0.614   |
|                        | Percentile 25 | 3,00                                              | 4,00  | 4,00  |         |
|                        | Percentile 75 | 12,50                                             | 11,00 | 11,00 |         |
