# Supplementary material for: Estimating Vaccine Confidence Levels among Healthcare Staff and Students of a Tertiary Institution in South Africa
Source: MDPI journal article supplement (doi:10.3390/vaccines9111246), 2021-10-27
Supplement: s1 [file s1]

**Table S13a:** Association between levels of education, vaccine confidence statements and the intention to receive a COVID 19 vaccine

| Statements                                                   | Undergraduates<br>(BSc. & MBBS) |          | Postgraduates<br>(Honours & above) |          | Pearson's chi square<br>2-sided p-value |
|--------------------------------------------------------------|---------------------------------|----------|------------------------------------|----------|-----------------------------------------|
|                                                              | Agree                           | Disagree | Agree                              | Disagree |                                         |
| 1. Vaccines are important for children to have               | 92.2%                           | 2.8%     | 97.6%                              | 2.4%     | 0.841                                   |
| 2. Vaccines are important for me to have                     | 95.1%                           | 4.9%     | 95.9%                              | 4.1%     | 0.664                                   |
| 3. Overall, I think vaccines are safe                        | 95.9%                           | 4.1%     | 94.7%                              | 5.3%     | 0.431                                   |
| 4. Overall, I think vaccines are effective                   | 98.0%                           | 2.0%     | 96.6%                              | 3.4%     | 0.218                                   |
| 5. Vaccines are compatible with my religious beliefs         | 96.1%                           | 3.9%     | 96.1%                              | 96.1%    | 1.000                                   |
| 6. I will take a Covid-19 vaccine when one becomes available | 89.4%                           | 10.6%    | 89.6%                              | 10.4%    | 1.000                                   |
