# Supplementary material for: Estimating Vaccine Confidence Levels among Healthcare Staff and Students of a Tertiary Institution in South Africa
Source: MDPI journal article supplement (doi:10.3390/vaccines9111246), 2021-10-27
Supplement: s1 [file s1]

**Table S8:** Associations between quantitative variables and vaccine effectiveness statement

| Quantitative variables |               | Overall, I think vaccines are effective |       |       | p-value |
|------------------------|---------------|-----------------------------------------|-------|-------|---------|
|                        |               | Disagree                                | Agree | Total |         |
| Age                    | Median        | 33,00                                   | 29,00 | 29,00 | 0.236   |
|                        | Percentile 25 | 23,00                                   | 21,00 | 22,00 |         |
|                        | Percentile 75 | 44,00                                   | 38,00 | 38,00 |         |
| Post matric            | Median        | 9,00                                    | 6,00  | 6,00  | 0.200   |
|                        | Percentile 25 | 5,00                                    | 4,00  | 4,00  |         |
|                        | Percentile 75 | 14,00                                   | 11,00 | 11,00 |         |
