# Supplementary material for: Estimating Vaccine Confidence Levels among Healthcare Staff and Students of a Tertiary Institution in South Africa
Source: MDPI journal article supplement (doi:10.3390/vaccines9111246), 2021-10-27
Supplement: s1 [file s1]

**Table S11:** Associations between categorical demographic variables and intention to receive COVID 19 vaccine

| Categorical demographic variables |                   | I will take a Covid-19 vaccine when one becomes available |         |       |         |       |         | p-value |
|-----------------------------------|-------------------|-----------------------------------------------------------|---------|-------|---------|-------|---------|---------|
|                                   |                   | Disagree                                                  |         | Agree |         | Total |         |         |
|                                   |                   | Count                                                     | Row N % | Count | Row N % | Count | Row N % |         |
| Staff/Student                     | Staff             | 19                                                        | 8.3%    | 210   | 91.7%   | 229   | 100.0%  | 0.383   |
|                                   | Student           | 63                                                        | 11.1%   | 504   | 88.9%   | 567   | 100.0%  |         |
|                                   | Both              | 10                                                        | 13.0%   | 67    | 87.0%   | 77    | 100.0%  |         |
|                                   | Total             | 92                                                        | 10.5%   | 781   | 89.5%   | 873   | 100.0%  |         |
| Sex                               | Male              | 20                                                        | 8.5%    | 216   | 91.5%   | 236   | 100.0%  | 0.317   |
|                                   | Female            | 70                                                        | 11.0%   | 565   | 89.0%   | 635   | 100.0%  |         |
|                                   | Other             | 2                                                         | 100.0%  | 0     | 0.0%    | 2     | 100.0%  |         |
|                                   | Total             | 92                                                        | 10.5%   | 781   | 89.5%   | 873   | 100.0%  |         |
| degree                            | BSc               | 35                                                        | 11.7%   | 263   | 88.3%   | 298   | 100.0%  | 0.161   |
|                                   | Hons              | 18                                                        | 16.1%   | 94    | 83.9%   | 112   | 100.0%  |         |
|                                   | MBBS              | 18                                                        | 9.0%    | 182   | 91.0%   | 200   | 100.0%  |         |
|                                   | MSc               | 15                                                        | 8.5%    | 162   | 91.5%   | 177   | 100.0%  |         |
|                                   | PhD               | 6                                                         | 7.0%    | 80    | 93.0%   | 86    | 100.0%  |         |
|                                   | Total             | 92                                                        | 10.5%   | 781   | 89.5%   | 873   | 100.0%  |         |
| religion                          | Islam             | 7                                                         | 7.5%    | 86    | 92.5%   | 93    | 100.0%  | .       |
|                                   | Roman Catholic    | 11                                                        | 12.8%   | 75    | 87.2%   | 86    | 100.0%  |         |
|                                   | Orthodox          | 31                                                        | 11.6%   | 237   | 88.4%   | 268   | 100.0%  |         |
|                                   | Pentecostal       | 22                                                        | 13.7%   | 139   | 86.3%   | 161   | 100.0%  |         |
|                                   | Traditional       | 7                                                         | 11.1%   | 56    | 88.9%   | 63    | 100.0%  |         |
|                                   | Jewish            | 1                                                         | 14.3%   | 6     | 85.7%   | 7     | 100.0%  |         |
|                                   | Buddhist          | 1                                                         | 25.0%   | 3     | 75.0%   | 4     | 100.0%  |         |
|                                   | Hindu             | 0                                                         | 0.0%    | 24    | 100.0%  | 24    | 100.0%  |         |
|                                   | Atheist           | 4                                                         | 5.6%    | 68    | 94.4%   | 72    | 100.0%  |         |
|                                   | Agnostic          | 2                                                         | 2.9%    | 66    | 97.1%   | 68    | 100.0%  |         |
|                                   | Other             | 2                                                         | 10.0%   | 18    | 90.0%   | 20    | 100.0%  |         |
|                                   | 7th Day Adventist | 4                                                         | 57.1%   | 3     | 42.9%   | 7     | 100.0%  |         |
|                                   | Total             | 92                                                        | 10.5%   | 781   | 89.5%   | 873   | 100.0%  |         |
| Age group                         | ≤24               | 38                                                        | 10.9%   | 311   | 89.1%   | 349   | 100.0%  | 0.992   |
|                                   | 25-34             | 20                                                        | 9.8%    | 185   | 90.2%   | 205   | 100.0%  |         |
|                                   | 35-44             | 18                                                        | 10.8%   | 148   | 89.2%   | 166   | 100.0%  |         |
|                                   | 45-54             | 7                                                         | 9.3%    | 68    | 90.7%   | 75    | 100.0%  |         |

|  |       |    |       |     |       |     |        |  |
|--|-------|----|-------|-----|-------|-----|--------|--|
|  | 55-64 | 8  | 11.9% | 59  | 88.1% | 67  | 100.0% |  |
|  | ≥65   | 1  | 9.1%  | 10  | 90.9% | 11  | 100.0% |  |
|  | Total | 92 | 10.5% | 781 | 89.5% | 873 | 100.0% |  |
