# Supplementary material for: Estimating Vaccine Confidence Levels among Healthcare Staff and Students of a Tertiary Institution in South Africa
Source: MDPI journal article supplement (doi:10.3390/vaccines9111246), 2021-10-27
Supplement: s1 [file s1]

**Table S 13b:** Association between levels of education, vaccine confidence statements and the intention to receive a COVID 19

| Statements                                                   | Up to Honors<br>(BSc., MBBS, &<br>Honors) |          | Masters & above<br>(Masters &<br>Ph.D.) |          | P-<br>value |
|--------------------------------------------------------------|-------------------------------------------|----------|-----------------------------------------|----------|-------------|
|                                                              | Agree                                     | Disagree | Agree                                   | Disagree |             |
| 1. Vaccines are important for children to have               | 97.0%                                     | 3.0%     | 98.3%                                   | 1.7%     | 0.381       |
| 2. Vaccines are important for me to have                     | 94.5%                                     | 5.5%     | 97.6%                                   | 2.4%     | 0.043       |
| 3. Overall, I think vaccines are safe                        | 95.2%                                     | 4.8%     | 96.0%                                   | 4.6%     | 0.612       |
| 4. Overall, I think vaccines are effective                   | 97.2%                                     | 2.8%     | 97.9%                                   | 2.1%     | 0.660       |
| 5. Vaccines are compatible with my religious beliefs         | 95.6%                                     | 4.4%     | 97.3%                                   | 2.7%     | 0.262       |
| 6. I will take a Covid-19 vaccine when one becomes available | 88.4%                                     | 11.6%    | 92.0%                                   | 8.0%     | 0.119       |
