# Supplementary material for: Estimating Vaccine Confidence Levels among Healthcare Staff and Students of a Tertiary Institution in South Africa
Source: MDPI journal article supplement (doi:10.3390/vaccines9111246), 2021-10-27
Supplement: s1 [file s1]

**Table S2:** Associations between quantitative variables and importance of vaccines for children statement

| Quantitative variables               |               | Vaccines are important for children to have statement |       |       | p-value |
|--------------------------------------|---------------|-------------------------------------------------------|-------|-------|---------|
|                                      |               | Disagree                                              | Agree | Total |         |
| age                                  | Median        | 24.00                                                 | 29.00 | 29.00 | 0.523   |
|                                      | Percentile 25 | 20.00                                                 | 22.00 | 22.00 |         |
|                                      | Percentile 75 | 39.00                                                 | 38.00 | 38.00 |         |
| Post matric<br>years of<br>schooling | Median        | 5.50                                                  | 6.00  | 6.00  | 0.572   |
|                                      | Percentile 25 | 3.00                                                  | 4.00  | 4.00  |         |
|                                      | Percentile 75 | 13.00                                                 | 11.00 | 11.00 |         |
