# Supplementary material for: Estimating Vaccine Confidence Levels among Healthcare Staff and Students of a Tertiary Institution in South Africa
Source: MDPI journal article supplement (doi:10.3390/vaccines9111246), 2021-10-27
Supplement: s1 [file s1]

**Table S12:** Associations between quantitative variables and intention to receive COVID 19 vaccine

| Quantitative variables |               | I will take a Covid-19 vaccine when one becomes available |       |       | p-value |
|------------------------|---------------|-----------------------------------------------------------|-------|-------|---------|
|                        |               | Disagree                                                  | Agree | Total |         |
| Age                    | Median        | 30,00                                                     | 30,00 | 30,00 | 0.990   |
|                        | Percentile 25 | 21,00                                                     | 22,00 | 22,00 |         |
|                        | Percentile 75 | 38,00                                                     | 39,00 | 38,00 |         |
| Post matric            | Median        | 5,00                                                      | 6,00  | 6,00  | 0.301   |
|                        | Percentile 25 | 3,00                                                      | 4,00  | 4,00  |         |
|                        | Percentile 75 | 12,00                                                     | 11,00 | 11,00 |         |
